# Supplementary material for: Identification of Glial Activation Markers by Comparison of Transcriptome Changes between Astrocytes and Microglia following Innate Immune Stimulation
Source: PubMed Central journal article supplement (PMC4516330; doi:10.1371/journal.pone.0127336), 2015-07-27
Supplement: pone.0127336.s001.pdf [file pone.0127336.s001.pdf]

**S1 Fig. Genes upregulated only in microglia and not astrocytes.** Genes whose mRNA expression was upregulated or down-regulated in microglia but not astrocytes were graphed according to their average fold increase in microglia. All genes are presented (partial graph of genes is shown in Fig. 3). Data for astrocytes are also shown. Data are the mean fold increase relative to mock-infected samples for each cell type. n = 6 for each group including mock groups. Green bars indicate the relative increase over the range of all upregulated genes with a high value of 17.2 (Marco) and a low value of -8.90 (Rgs2).

| Rank | Gene Accession | Gene Symbol       | Gene Description                                            | Microglia | Astrocyte |
|------|----------------|-------------------|-------------------------------------------------------------|-----------|-----------|
| 1    | NM_010766      | <i>Marco</i>      | macrophage receptor with collagenous structure              | 17.20     | 1.32      |
| 2    | NM_013653      | <i>Ccl5</i>       | chemokine (C-C motif) ligand 5                              | 14.66     | 1.01      |
| 3    | NM_153511      | <i>Il1f9</i>      | interleukin 1 family, member 9                              | 14.56     | 1.17      |
| 4    | NM_011315      | <i>Saa3</i>       | serum amyloid A 3                                           | 13.03     | 1.10      |
| 5    | NM_010927      | <i>Nos2</i>       | nitric oxide synthase 2, inducible                          | 11.22     | 1.61      |
| 6    | NM_010260      | <i>Gbp2</i>       | guanylate binding protein 2                                 | 10.00     | 1.86      |
| 7    | NM_022415      | <i>Ptges</i>      | prostaglandin E synthase                                    | 9.32      | 1.39      |
| 8    | NM_008204      | <i>H2-M2</i>      | histocompatibility 2, M region locus 2                      | 9.05      | 1.26      |
| 9    | NM_009421      | <i>Traf1</i>      | TNF receptor-associated factor 1                            | 9.02      | 1.88      |
| 10   | NM_001037917   | <i>EG622976</i>   | predicted gene, EG622976                                    | 7.94      | 1.66      |
| 11   | NM_011111      | <i>Serpinb2</i>   | serine (or cysteine) peptidase inhibitor, clade B, member 2 | 7.59      | 1.27      |
| 12   | NM_007646      | <i>Cd38</i>       | CD38 antigen                                                | 7.23      | 1.41      |
| 13   | NM_017466      | <i>Ccr12</i>      | chemokine (C-C motif) receptor-like 2                       | 5.60      | 1.64      |
| 14   | NM_008413      | <i>Jak2</i>       | Janus kinase 2                                              | 5.48      | 1.74      |
| 15   | NM_010728      | <i>Lox</i>        | lysyl oxidase                                               | 5.42      | 1.57      |
| 16   | NM_018734      | <i>Gbp3</i>       | guanylate binding protein 3                                 | 5.12      | 1.40      |
| 17   | NM_008198      | <i>Cfb</i>        | complement factor B                                         | 5.04      | -1.01     |
| 18   | NM_030701      | <i>Niacr1</i>     | niacin receptor 1                                           | 4.98      | 1.34      |
| 19   | NM_008356      | <i>Il13ra2</i>    | interleukin 13 receptor, alpha 2                            | 4.94      | 1.10      |
| 20   | NM_021384      | <i>Rsad2</i>      | radical S-adenosyl methionine domain containing 2           | 4.92      | 1.58      |
| 21   | NM_170701      | <i>Cd40</i>       | CD40 antigen                                                | 4.80      | 1.27      |
| 22   | NM_008655      | <i>Gadd45b</i>    | growth arrest and DNA-damage-inducible 45 beta              | 4.77      | 1.24      |
| 23   | NM_008591      | <i>Met</i>        | met proto-oncogene                                          | 4.71      | 1.04      |
| 24   | NM_001080813   | <i>Rab11fip1</i>  | RAB11 family interacting protein 1 (class I)                | 4.68      | 1.13      |
| 25   | NM_009778      | <i>C3</i>         | complement component 3                                      | 4.20      | 1.15      |
| 26   | NM_021893      | <i>Cd274</i>      | CD274 antigen                                               | 4.19      | 1.77      |
| 27   | NM_010548      | <i>Il10</i>       | interleukin 10                                              | 4.09      | 1.14      |
| 28   | NM_010174      | <i>Fabp3</i>      | fatty acid binding protein 3, muscle and heart              | 4.03      | 1.13      |
| 29   | NM_008608      | <i>Mmp14</i>      | matrix metalloproteinase 14 (membrane-inserted)             | 3.98      | 1.13      |
| 30   | NM_145827      | <i>Nlrp3</i>      | NLR family, pyrin domain containing 3                       | 3.95      | 1.86      |
| 31   | NM_017370      | <i>Hp</i>         | haptoglobin                                                 | 3.94      | 1.31      |
| 32   | NM_010104      | <i>Edn1</i>       | endothelin 1                                                | 3.86      | 1.20      |
| 33   | NM_008331      | <i>Ifit1</i>      | interferon-induced protein with tetratricopeptide repeats 1 | 3.77      | 1.31      |
| 34   | NM_009137      | <i>Ccl22</i>      | chemokine (C-C motif) ligand 22                             | 3.76      | 1.23      |
| 35   | NM_010407      | <i>Hck</i>        | hemopoietic cell kinase                                     | 3.75      | 1.41      |
| 36   | NM_008360      | <i>Il18</i>       | interleukin 18                                              | 3.67      | 1.25      |
| 37   | NM_025967      | <i>D16Ert472e</i> | DNA segment, Chr 16, ERATO Doi 472, expressed               | 3.65      | 1.23      |
| 38   | NM_009647      | <i>Ak3l1</i>      | adenylate kinase 3-like 1                                   | 3.64      | 1.16      |
| 39   | NM_033322      | <i>Lztf1</i>      | leucine zipper transcription factor-like 1                  | 3.60      | 1.12      |
| 40   | NM_028935      | <i>Zfp558</i>     | zinc finger protein 558                                     | 3.58      | -1.04     |
| 41   | NM_194336      | <i>Mpa2l</i>      | macrophage activation 2 like                                | 3.56      | 1.74      |
| 42   | NM_007707      | <i>Socs3</i>      | suppressor of cytokine signaling 3                          | 3.55      | 1.23      |
| 43   | NM_011990      | <i>Slc7a11</i>    | solute carrier family 7, member 11                          | 3.51      | 1.65      |
| 44   | NM_023908      | <i>Slco3a1</i>    | solute carrier organic anion transporter family, member 3a1 | 3.49      | 1.18      |
| 45   | NM_010501      | <i>Ifit3</i>      | interferon-induced protein with tetratricopeptide repeats 3 | 3.49      | 1.00      |
| 46   | NM_008332      | <i>Ifit2</i>      | interferon-induced protein with tetratricopeptide repeats 2 | 3.46      | 1.05      |
| 47   | NM_008607      | <i>Mmp13</i>      | matrix metalloproteinase 13                                 | 3.39      | 1.24      |
| 48   | NM_028523      | <i>Dcbl2</i>      | discoidin, CUB and LCCL domain containing 2                 | 3.32      | 1.18      |
| 49   | NM_013642      | <i>Dusp1</i>      | dual specificity phosphatase 1                              | 3.31      | -1.03     |
| 50   | NM_008327      | <i>Ifi202b</i>    | interferon activated gene 202B                              | 3.30      | 1.13      |
| 51   | NM_133232      | <i>Pfkfb3</i>     | 6-phosphofructo-2-kinase/fructose-2,6-biphosphatase 3       | 3.27      | 1.06      |
| 52   | NM_013831      | <i>Pstpip2</i>    | proline-serine-threonine phosphatase-interacting protein 2  | 3.16      | 1.47      |
| 53   | NM_019840      | <i>Pde4b</i>      | phosphodiesterase 4B, cAMP specific                         | 3.13      | 1.52      |

|     |              |                 |                                                            |      |       |
|-----|--------------|-----------------|------------------------------------------------------------|------|-------|
| 54  | BC049633     | AA467197        | expressed sequence AA467197                                | 3.10 | 1.52  |
| 55  | NM_010274    | <i>Gpd2</i>     | glycerol phosphate dehydrogenase 2, mitochondrial          | 3.07 | -1.04 |
| 56  | NM_001033302 | <i>Gm129</i>    | gene model 129, (NCBI)                                     | 3.07 | -1.12 |
| 57  | NM_009344    | <i>Phlda1</i>   | pleckstrin homology-like domain, family A, member 1        | 3.07 | 1.46  |
| 58  | NM_172050    | <i>Cd300e</i>   | CD300e antigen                                             | 3.05 | 1.10  |
| 59  | NM_009477    | <i>Upp1</i>     | uridine phosphorylase 1                                    | 3.03 | 1.20  |
| 60  | NR_003508    | <i>Mx2</i>      | myxovirus (influenza virus) resistance 2                   | 3.02 | 1.07  |
| 61  | NM_015766    | <i>Ebi3</i>     | Epstein-Barr virus induced gene 3                          | 2.99 | 1.30  |
| 62  | NM_013599    | <i>Mmp9</i>     | matrix metalloproteinase 9                                 | 2.98 | 1.43  |
| 63  | NM_133209    | <i>Pilrb1</i>   | paired immunoglobulin-like type 2 receptor beta 1          | 2.95 | 1.20  |
| 64  | NM_013790    | <i>Abcc5</i>    | ATP-binding cassette, sub-family C, member 5               | 2.95 | 1.13  |
| 65  | NM_028133    | <i>Egln3</i>    | EGL nine homolog 3 (C. elegans)                            | 2.90 | 1.05  |
| 66  | NM_133661    | <i>Slc6a12</i>  | solute carrier family 6, member 12                         | 2.90 | 1.07  |
| 67  | NM_015783    | <i>Isg15</i>    | ISG15 ubiquitin-like modifier                              | 2.88 | 1.07  |
| 68  | NM_010809    | <i>Mmp3</i>     | matrix metalloproteinase 3                                 | 2.88 | 1.14  |
| 69  | AK220416     | <i>Zc3h12c</i>  | zinc finger CCCH type containing 12C                       | 2.87 | 1.43  |
| 70  | NM_009627    | <i>Adm</i>      | adrenomedullin                                             | 2.86 | 1.17  |
| 71  | NM_130447    | <i>Dusp16</i>   | dual specificity phosphatase 16                            | 2.86 | 1.20  |
| 72  | NM_008987    | <i>Ptx3</i>     | pentraxin related gene                                     | 2.82 | 1.19  |
| 73  | NM_008501    | <i>Lif</i>      | leukemia inhibitory factor                                 | 2.81 | 1.36  |
| 74  | NM_033322    | <i>Lztf1</i>    | leucine zipper transcription factor-like 1                 | 2.78 | 1.20  |
| 75  | NM_001081211 | <i>Ptafr</i>    | platelet-activating factor receptor                        | 2.77 | -1.04 |
| 76  | NM_001040400 | <i>Tet2</i>     | tet oncogene family member 2                               | 2.75 | 1.02  |
| 77  | NM_030259    | <i>Rilpl2</i>   | Rab interacting lysosomal protein-like 2                   | 2.75 | 1.31  |
| 78  | NM_009760    | <i>Bnip3</i>    | BCL2/adenovirus E1B interacting protein 3                  | 2.74 | 1.14  |
| 79  | NM_007413    | <i>Adora2b</i>  | adenosine A2b receptor                                     | 2.73 | 1.25  |
| 80  | NM_001099624 | <i>Rapgef2</i>  | Rap guanine nucleotide exchange factor (GEF) 2             | 2.68 | 1.02  |
| 81  | NM_008380    | <i>Inhba</i>    | inhibin beta-A                                             | 2.67 | 1.15  |
| 82  | NM_011580    | <i>Thbs1</i>    | thrombospondin 1                                           | 2.67 | -1.06 |
| 83  | NM_001163567 | <i>Fam102b</i>  | family with sequence similarity 102, member B              | 2.66 | -1.06 |
| 84  | NM_181545    | <i>Slfn8</i>    | schlafen 8                                                 | 2.66 | 1.27  |
| 85  | NM_175549    | <i>Robo2</i>    | roundabout homolog 2 (Drosophila)                          | 2.65 | 1.01  |
| 86  | NM_025681    | <i>Lix1</i>     | limb expression 1 homolog (chicken)                        | 2.63 | 1.01  |
| 87  | NM_007972    | <i>F10</i>      | coagulation factor X                                       | 2.58 | 1.02  |
| 88  | NM_007936    | <i>Epha4</i>    | Eph receptor A4                                            | 2.53 | -1.07 |
| 89  | NM_008215    | <i>Has1</i>     | hyaluronan synthase1                                       | 2.52 | -1.01 |
| 90  | NM_028680    | <i>Ift57</i>    | intraflagellar transport 57 homolog (Chlamydomonas)        | 2.51 | 1.06  |
| 91  | NM_009971    | <i>Csf3</i>     | colony stimulating factor 3 (granulocyte)                  | 2.50 | 1.08  |
| 92  | NM_031167    | <i>Il1rn</i>    | interleukin 1 receptor antagonist                          | 2.49 | 1.16  |
| 93  | NM_130877    | <i>Peg10</i>    | paternally expressed 10                                    | 2.49 | -1.17 |
| 94  | NM_001102404 | <i>Acp5</i>     | acid phosphatase 5, tartrate resistant                     | 2.45 | 1.11  |
| 95  | NM_138648    | <i>Olr1</i>     | oxidized low density lipoprotein (lectin-like) receptor 1  | 2.41 | 1.17  |
| 96  | NM_021524    | <i>Nampt</i>    | nicotinamide phosphoribosyltransferase                     | 2.40 | 1.06  |
| 97  | NM_010846    | <i>Mx1</i>      | myxovirus (influenza virus) resistance 1                   | 2.39 | 1.10  |
| 98  | NM_134080    | <i>Flnb</i>     | filamin, beta                                              | 2.38 | -1.01 |
| 99  | NM_010162    | <i>Ext1</i>     | exostoses (multiple) 1                                     | 2.37 | 1.14  |
| 100 | NM_007616    | <i>Cav1</i>     | caveolin 1, caveolae protein                               | 2.37 | -1.08 |
| 101 | NM_029942    | <i>Preli2</i>   | PRELI domain containing 2                                  | 2.34 | 1.12  |
| 102 | NM_008329    | <i>Ifi204</i>   | interferon activated gene 204                              | 2.34 | 1.15  |
| 103 | NM_146085    | <i>Apbb3</i>    | amyloid beta precursor protein-binding, family B, member 3 | 2.34 | 1.01  |
| 104 | NM_026772    | <i>Cdc42ep2</i> | CDC42 effector protein (Rho GTPase binding) 2              | 2.33 | 1.00  |
| 105 | NM_212444    | <i>Gyk</i>      | glycerol kinase                                            | 2.31 | 1.11  |
| 106 | NM_030678    | <i>Gys1</i>     | glycogen synthase 1, muscle                                | 2.28 | 1.08  |
| 107 | NM_009642    | <i>Agtrap</i>   | angiotensin II, type I receptor-associated protein         | 2.27 | 1.06  |
| 108 | NM_008247    | <i>Ppap2a</i>   | phosphatidic acid phosphatase type 2A                      | 2.25 | 1.06  |
| 109 | NM_007494    | <i>Ass1</i>     | argininosuccinate synthetase 1                             | 2.24 | 1.10  |
| 110 | NM_001081249 | <i>Vcan</i>     | versican                                                   | 2.23 | 1.05  |
| 111 | NM_011171    | <i>Procr</i>    | protein C receptor, endothelial                            | 2.22 | 1.07  |
| 112 | NM_144839    | <i>Ube2e2</i>   | ubiquitin-conjugating enzyme E2E 2 (UBC4/5 homolog, yeast) | 2.18 | -1.03 |
| 113 | NM_001033922 | <i>Trem14</i>   | triggering receptor expressed on myeloid cells-like 4      | 2.10 | 1.01  |
| 114 | NM_031997    | <i>Tmem2</i>    | transmembrane protein 2                                    | 2.07 | 1.00  |
| 115 | NM_153402    | <i>Eif2c3</i>   | eukaryotic translation initiation factor 2C, 3             | 2.05 | 1.01  |

|     |              |                 |                                                               |                                                                                       |       |                                                                                       |       |
|-----|--------------|-----------------|---------------------------------------------------------------|---------------------------------------------------------------------------------------|-------|---------------------------------------------------------------------------------------|-------|
| 116 | NM_009921    | <i>Camp</i>     | cathelicidin antimicrobial peptide                            |    | 2.04  |    | 1.02  |
| 117 | NM_175272    | <i>Nav2</i>     | neuron navigator 2                                            |    | -2.01 |    | -1.01 |
| 118 | NM_011851    | <i>Nt5e</i>     | 5' nucleotidase, ecto                                         |    | -2.05 |    | 1.02  |
| 119 | NM_001113460 | <i>Tec</i>      | tec protein tyrosine kinase                                   |    | -2.08 |    | -1.03 |
| 120 | NM_023794    | <i>Etv5</i>     | ets variant gene 5                                            |    | -2.09 |    | -1.04 |
| 121 | NM_021886    | <i>Cenph</i>    | centromere protein H                                          |    | -2.09 |    | -1.01 |
| 122 | NM_153139    | <i>Slc36a1</i>  | solute carrier family 36, member 1                            |    | -2.09 |    | -1.01 |
| 123 | NM_001030307 | <i>Dkc1</i>     | dyskeratosis congenita 1, dyskerin homolog                    |    | -2.10 |    | 1.00  |
| 124 | NM_010931    | <i>Uhrf1</i>    | ubiquitin-like, containing PHD and RING finger domains, 1     |    | -2.12 |    | -1.02 |
| 125 | NM_134081    | <i>Dnajc9</i>   | DnaJ (Hsp40) homolog, subfamily C, member 9                   |    | -2.12 |    | 1.01  |
| 126 | NM_146069    | <i>Lrrc33</i>   | leucine rich repeat containing 33                             |    | -2.16 |    | -1.05 |
| 127 | NM_008563    | <i>Mcm3</i>     | minichromosome maintenance deficient 3                        |    | -2.17 |    | 1.08  |
| 128 | NM_010137    | <i>Epas1</i>    | endothelial PAS domain protein 1                              |    | -2.17 |    | -1.06 |
| 129 | NM_001025382 | <i>EG574403</i> | predicted gene, EG574403                                      |    | -2.17 |    | -1.05 |
| 130 | NM_001113518 | <i>Arhgef7</i>  | Rho guanine nucleotide exchange factor (GEF7)                 |    | -2.19 |    | -1.06 |
| 131 | NM_007930    | <i>Enc1</i>     | ectodermal-neural cortex 1                                    |    | -2.20 |    | -1.09 |
| 132 | NM_175429    | <i>Kctd12b</i>  | potassium channel tetramerisation domain containing 12b       |    | -2.21 |    | -1.04 |
| 133 | BC046640     | <i>Tmem173</i>  | transmembrane protein 173                                     |    | -2.23 |    | 1.03  |
| 134 | NM_011249    | <i>Rbl1</i>     | retinoblastoma-like 1 (p107)                                  |   | -2.23 |   | -1.10 |
| 135 | NM_172814    | <i>Lrp12</i>    | low density lipoprotein-related protein 12                    |  | -2.24 |  | -1.09 |
| 136 | NM_028904    | <i>Rmi1</i>     | RMI1, RecQ mediated genome instability 1, homolog             |  | -2.26 |  | -1.10 |
| 137 | NM_001110231 | <i>Cugbp2</i>   | CUG triplet repeat, RNA binding protein 2                     |  | -2.27 |  | -1.13 |
| 138 | NM_024290    | <i>Tnfrsf23</i> | tumor necrosis factor receptor superfamily, member 23         |  | -2.27 |  | 1.00  |
| 139 | NM_007691    | <i>Chek1</i>    | checkpoint kinase 1 homolog                                   |  | -2.28 |  | -1.04 |
| 140 | NM_146040    | <i>Cdca7l</i>   | cell division cycle associated 7 like                         |  | -2.28 |  | 1.04  |
| 141 | NM_008317    | <i>Hyal1</i>    | hyaluronoglucosaminidase 1                                    |  | -2.33 |  | -1.04 |
| 142 | NM_175645    | <i>Xylt1</i>    | xylosyltransferase 1                                          |  | -2.34 |  | -1.07 |
| 143 | NM_008921    | <i>Prim1</i>    | DNA primase, p49 subunit                                      |  | -2.34 |  | -1.09 |
| 144 | NM_021790    | <i>Cenpk</i>    | centromere protein K                                          |  | -2.35 |  | -1.11 |
| 145 | NM_172598    | <i>Wdhd1</i>    | WD repeat and HMG-box DNA binding protein 1                   |  | -2.39 |  | -1.05 |
| 146 | NM_031159    | <i>Apobec1</i>  | apolipoprotein B mRNA editing enzyme, catalytic polypeptide 1 |  | -2.42 |  | -1.14 |
| 147 | NM_176837    | <i>Arhgap18</i> | Rho GTPase activating protein 18                              |  | -2.42 |  | -1.13 |
| 148 | NM_008628    | <i>Msh2</i>     | mutS homolog 2                                                |  | -2.48 |  | 1.01  |
| 149 | NM_016920    | <i>Atp6v0a1</i> | ATPase, H <sup>+</sup> transporting, lysosomal V0 subunit A1  |  | -2.56 |  | -1.05 |
| 150 | NM_001080814 | <i>Fat3</i>     | FAT tumor suppressor homolog 3                                |  | -2.57 |  | -1.20 |
| 151 | BC027537     | <i>Gins1</i>    | GINS complex subunit 1 (Psf1 homolog)                         |  | -2.60 |  | -1.09 |
| 152 | NM_008533    | <i>Cd180</i>    | CD180 antigen                                                 |  | -2.60 |  | -1.06 |
| 153 | NM_008565    | <i>Mcm4</i>     | minichromosome maintenance deficient 4 homolog                |  | -2.64 |  | -1.06 |
| 154 | NM_001146180 | <i>Mtss1</i>    | metastasis suppressor 1                                       |  | -2.65 |  | -1.23 |
| 155 | NM_001142918 | <i>Tcf7l2</i>   | transcription factor 7-like 2, T-cell specific, HMG-box       |  | -2.67 |  | -1.14 |
| 156 | NM_134083    | <i>Rcctb2</i>   | RCC1 and BTB domain containing protein 2                      |  | -2.71 |  | -1.17 |
| 157 | NM_146073    | <i>Zdhhc14</i>  | zinc finger, DHHC domain containing 14                        |  | -2.72 |  | -1.16 |
| 158 | NM_008892    | <i>Pola1</i>    | polymerase (DNA directed), alpha 1                            |  | -2.75 |  | 1.01  |
| 159 | NM_177184    | <i>Vps13c</i>   | vacuolar protein sorting 13C (yeast)                          |  | -2.80 |  | -1.23 |
| 160 | NM_008969    | <i>Ptgs1</i>    | prostaglandin-endoperoxide synthase 1                         |  | -2.81 |  | -1.14 |
| 161 | NM_007420    | <i>Adrb2</i>    | adrenergic receptor, beta 2                                   |  | -2.82 |  | -1.04 |
| 162 | NM_019971    | <i>Pdgfc</i>    | platelet-derived growth factor, C polypeptide                 |  | -2.85 |  | -1.28 |
| 163 | NM_139232    | <i>Fgd4</i>     | FYVE, RhoGEF and PH domain containing 4                       |  | -2.86 |  | -1.07 |
| 164 | NM_178407    | <i>Arap2</i>    | ArfGAP with RhoGAP domain, ankyrin repeat and PH domain 2     |  | -2.92 |  | 1.03  |
| 165 | NM_133829    | <i>Mfsd6</i>    | major facilitator superfamily domain containing 6             |  | -2.95 |  | -1.10 |
| 166 | NM_008234    | <i>Hells</i>    | helicase, lymphoid specific                                   |  | -2.96 |  | -1.03 |
| 167 | NM_001001309 | <i>Itga8</i>    | integrin alpha 8                                              |  | -3.13 |  | -1.02 |
| 168 | NM_020567    | <i>Gmnn</i>     | geminin                                                       |  | -3.20 |  | -1.20 |
| 169 | NM_001013370 | <i>Sesn1</i>    | sestrin 1                                                     |  | -3.22 |  | -1.10 |
| 170 | NM_054102    | <i>Ivns1abp</i> | influenza virus NS1A binding protein                          |  | -3.39 |  | -1.03 |
| 171 | NM_001145960 | <i>Slc37a2</i>  | solute carrier family 37, member 2                            |  | -3.44 |  | -1.23 |
| 172 | NM_011994    | <i>Abcd2</i>    | ATP-binding cassette, sub-family D (ALD), member 2            |  | -3.67 |  | -1.28 |
| 173 | NM_007631    | <i>Ccnd1</i>    | cyclin D1                                                     |  | -3.84 |  | -1.04 |
| 174 | NM_008567    | <i>Mcm6</i>     | minichromosome maintenance deficient 6                        |  | -3.85 |  | -1.06 |
| 175 | NM_008873    | <i>Plau</i>     | plasminogen activator, urokinase                              |  | -4.12 |  | -1.50 |
| 176 | NM_177260    | <i>Tmem154</i>  | transmembrane protein 154                                     |  | -7.64 |  | -1.38 |
| 177 | NM_009061    | <i>Rgs2</i>     | regulator of G-protein signaling 2                            |  | -8.90 |  | -1.93 |
